# Supplementary material for: Study protocol for a double blind, randomised, placebo-controlled trial of continuous subpectoral local anaesthetic infusion for pain and shoulder function following mastectomy: SUB-pectoral Local anaesthetic Infusion following MastEctomy (SUBLIME) study
Source: HighWire-hosted journal article supplement (doi:10.1136/bmjopen-2014-006318), 2014-09-01
Supplement: bmjopen-2014-006318supp.pdf [file bmjopen-2014-006318supp.pdf]

## **APPENDIX 1**

### **Standardised anaesthesia protocol for SUBLIME trial participants**

#### **Pre-op:**

No specific premedication

#### **Peri-op:**

Paracetamol 1g IV

Ondansetron 4mg IV

Dexamethasone 3.3mg (+/- 0.1mg)\* IV unless clinically contraindicated

Intubation and ventilation at anaesthetist's discretion - with muscle relaxant of anaesthetist's choice

Sevoflurane in air: depth of anaesthesia at anaesthetist's discretion

Fentanyl: 3-6 mcg/kg IV during surgery

Fluids: at anaesthetist's discretion

All other non-opiate and non-anti-emetic drugs: at anaesthetist's discretion

#### **Post-op:**

IV rescue morphine in recovery unit, 2mg increments

IV morphine PCA, 1mg bolus, 5 minute lockout

Paracetamol 1g 6-hourly orally

Ibuprofen 400mg 8-hourly orally unless contraindicated

PRN: ondansetron 4mg (IV) 8-hrly and cyclizine 50mg (IV) 8-hrly

*\*Dexamethasone concentration differs between manufacturers and is typically available as 8mg dexamethasone in 2mls (4mg/ml dexamethasone) or as dexamethasone phosphate 4mg/ml (equivalent to 3.3mg/ml dexamethasone). Either preparation is acceptable i.e. 1ml of 4mg/ml dexamethasone phosphate (3.3mg dexamethasone) or 0.8ml of 4mg/ml dexamethasone (3.2mg dexamethasone).*
